# Supplementary material for: Leveraging PMF Time Series Characteristics from Multi-PAMS Measurements for NMHC Source Investigation and Ozone Formation Insights
Source: Copernicus journal article supplement (doi:10.5194/egusphere-2025-4090), 2025-09-11
Supplement: Supplementary file 1 [file egusphere-2025-4090-supplement.pdf]

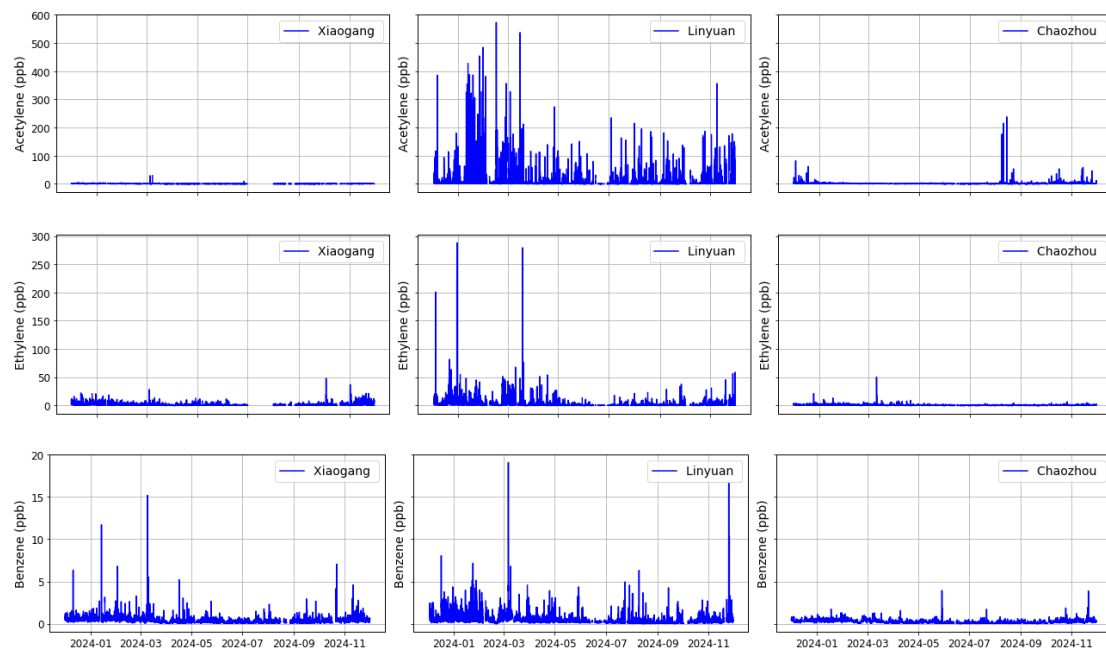

Fig. S1 High-temporal-resolution PAMS data (01/12/2023 – 30/11/2024). Examples of acetylene, ethylene, and benzene species

a) Winter  
Xiaogang

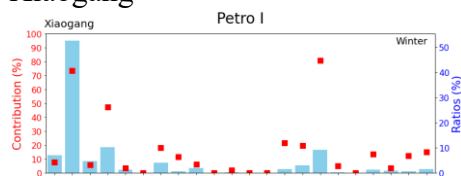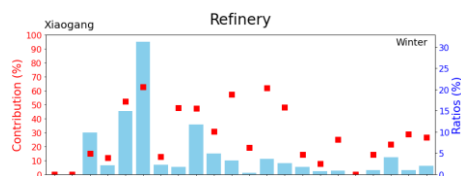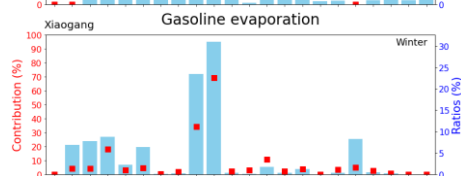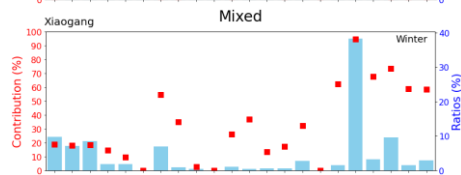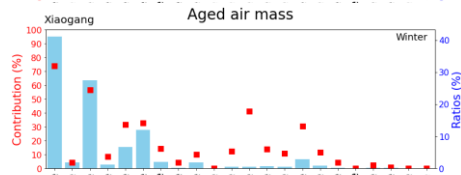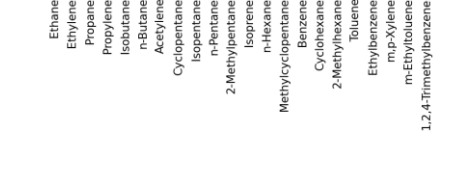

## Linyuan

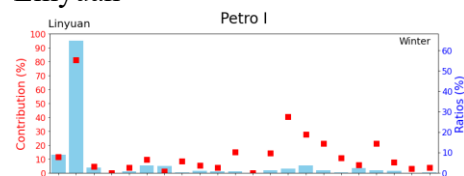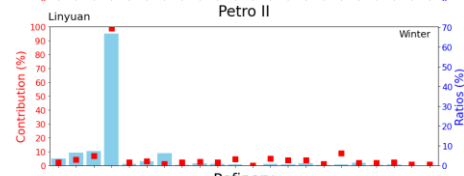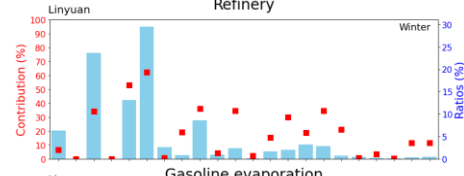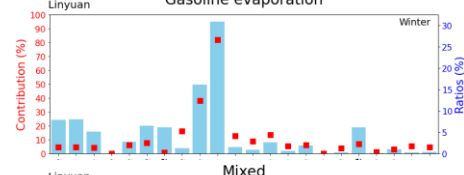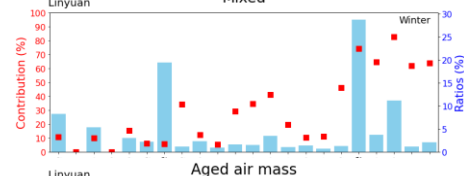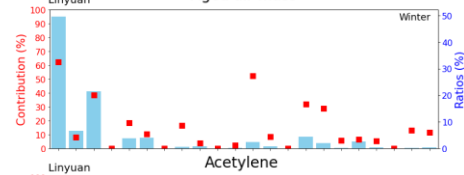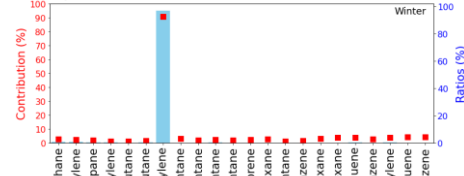

## Chaozhou

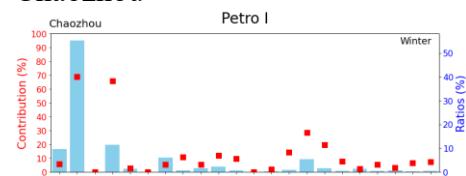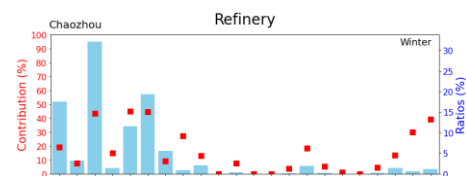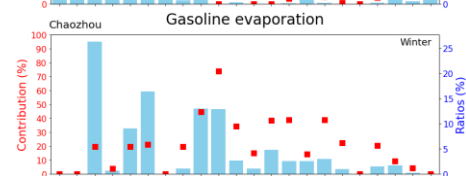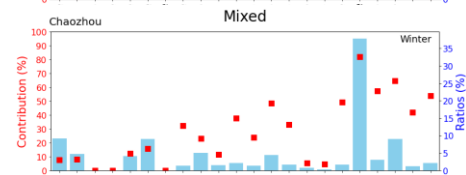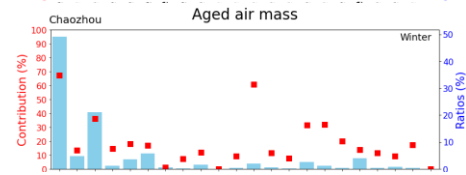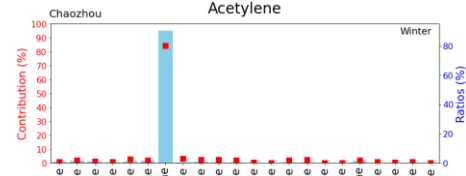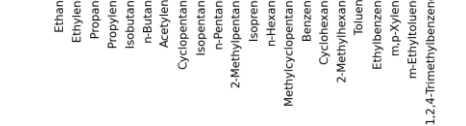

b) Spring

Xiaogang

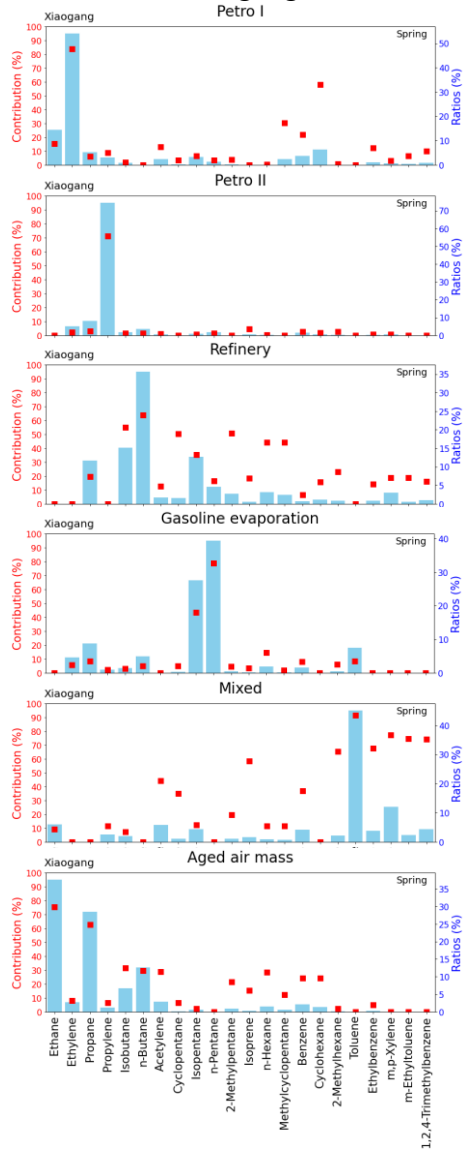

Linyuan

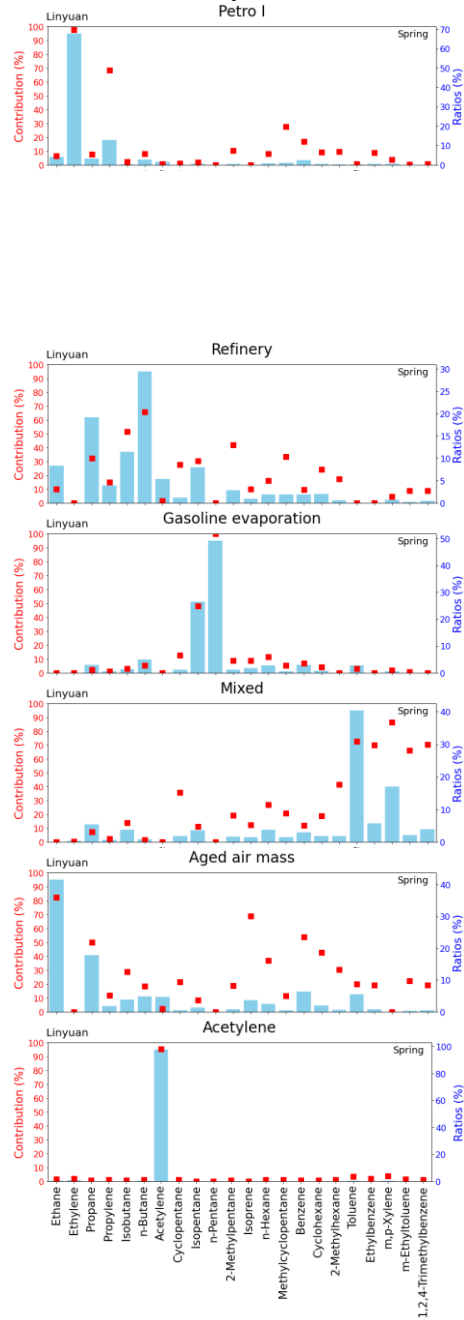

Chaozhou

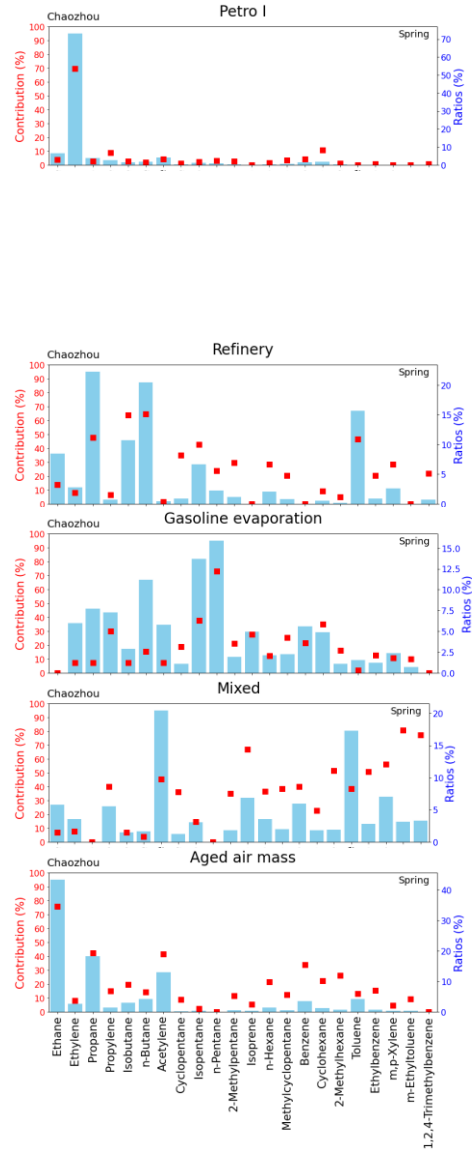

c) Summer

## Xiaogang

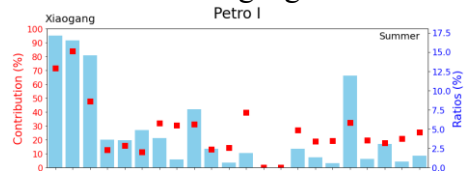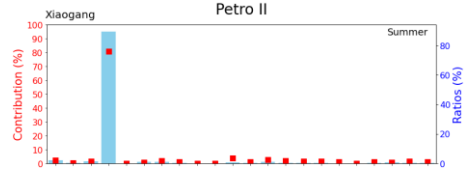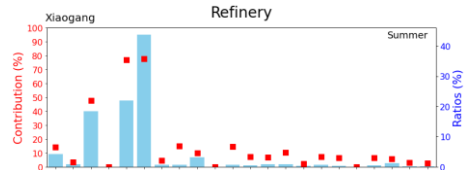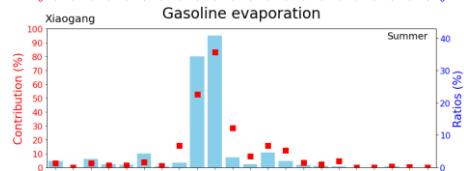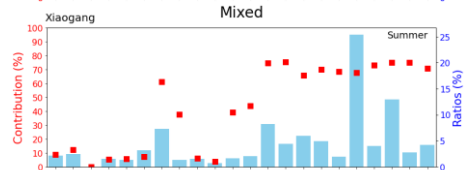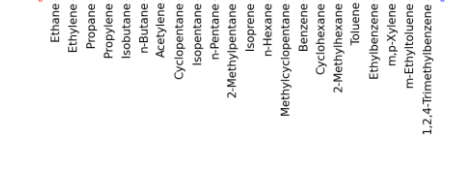

## Linyuan

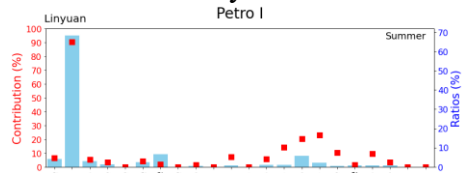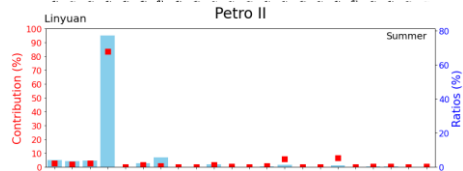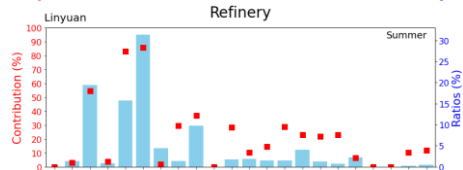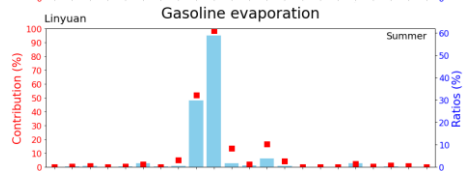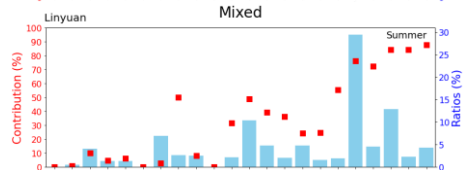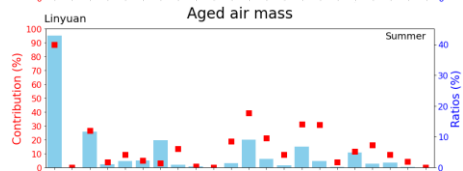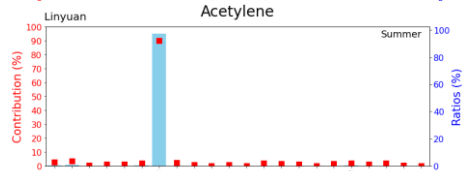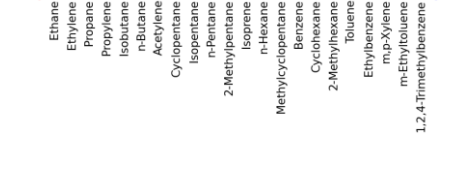

## Chaozhou

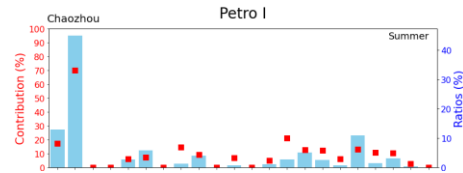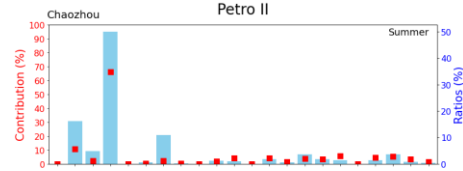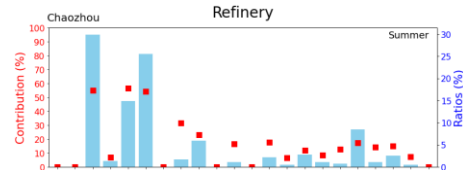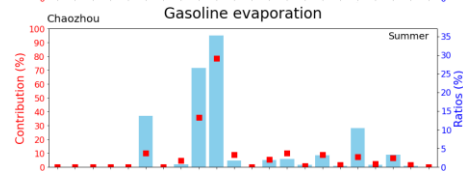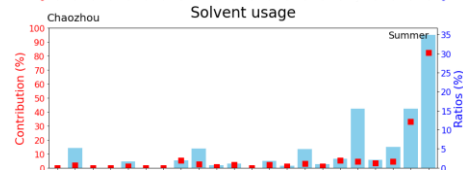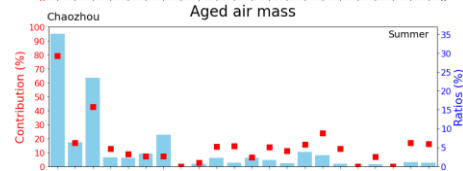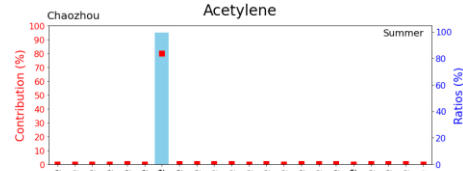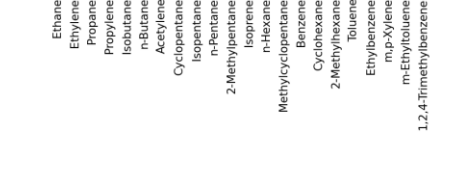

## Chaozhou

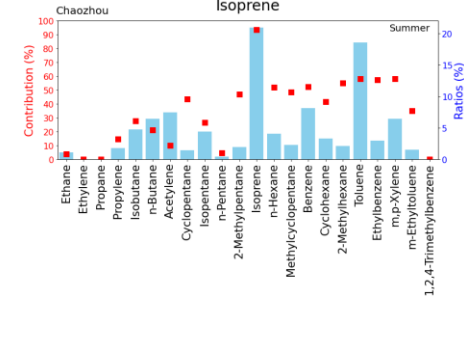

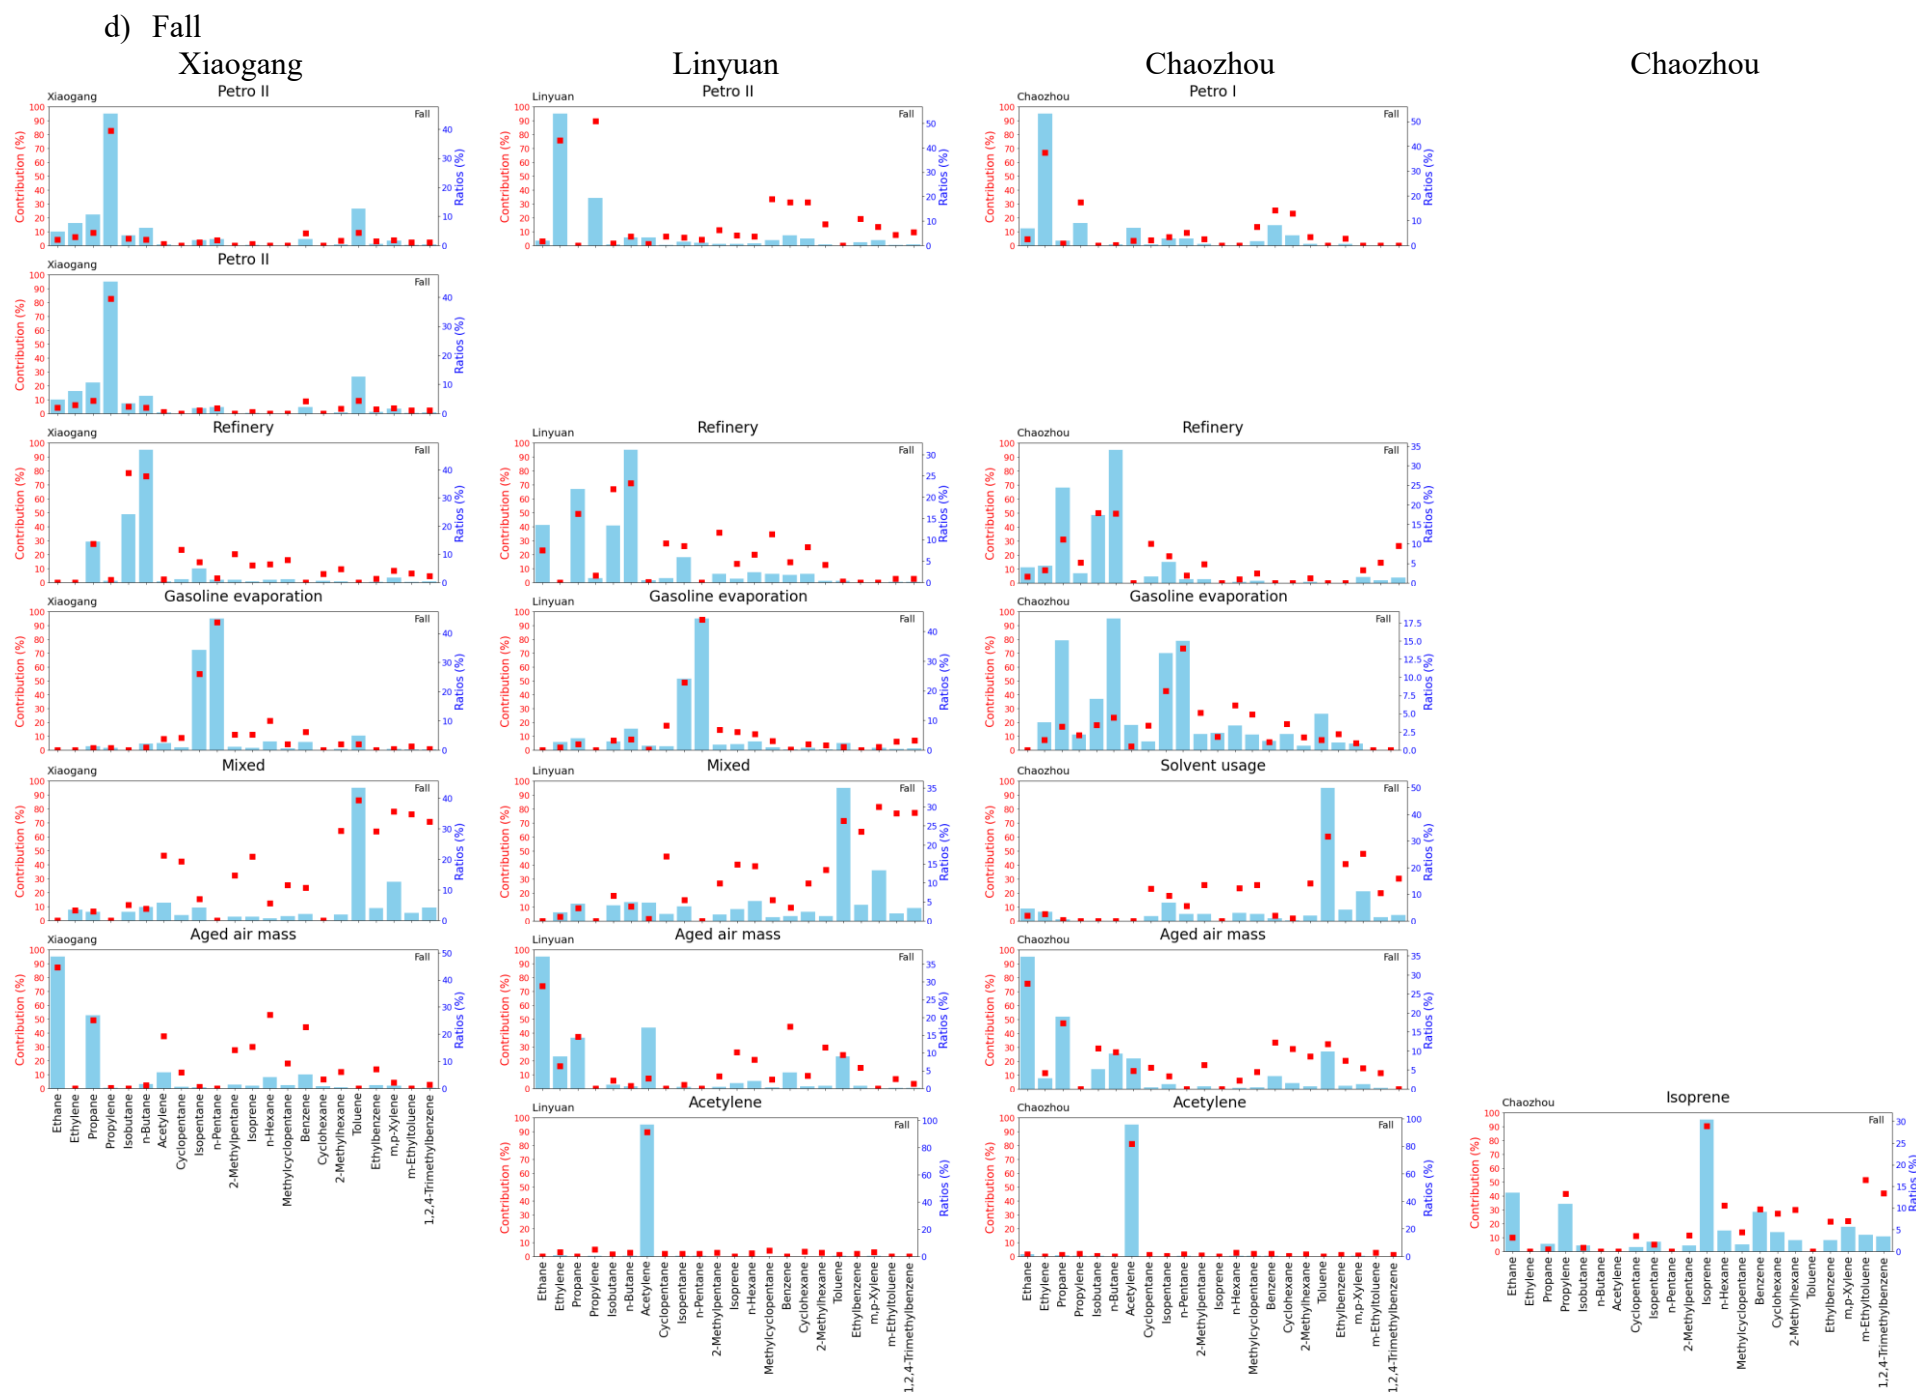

Fig. S2 Details of profile factors at study sites across the seasons: a) winter, b) spring, c) summer, d) fall

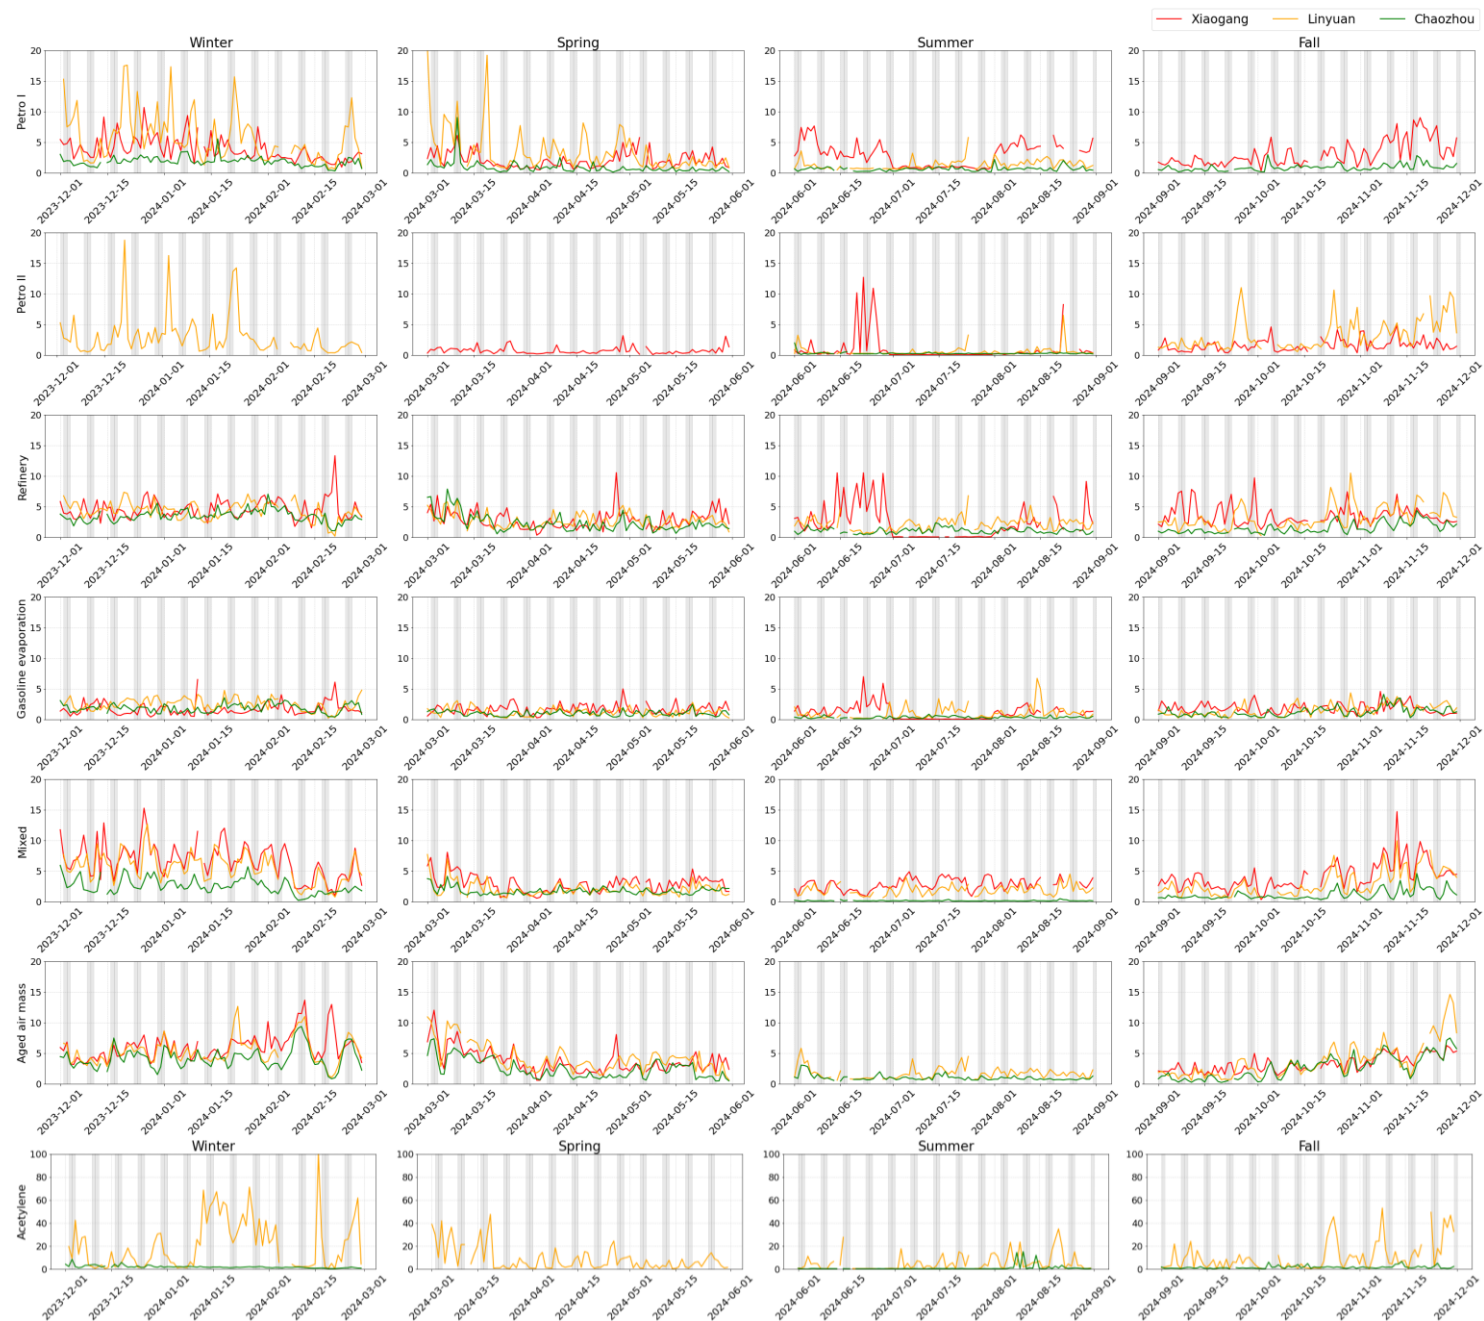

Fig. S3 Seasonal variation of daily mean contributions from PMF-resolved factors. Shaded columns represent weekends.

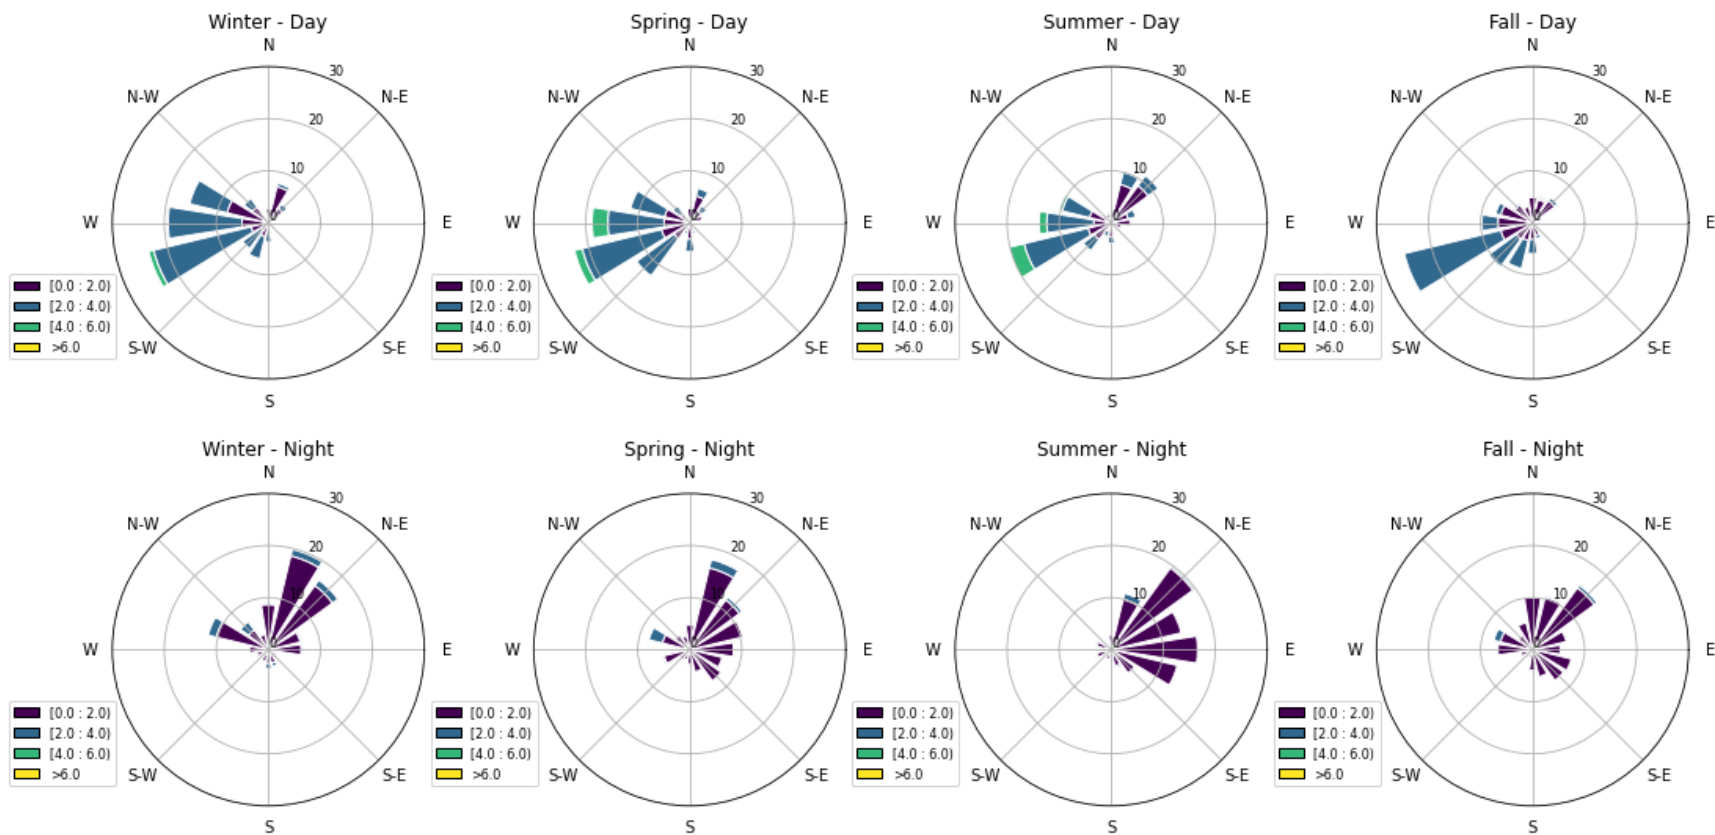

Fig. S4 Day-Night wind profile for aged air mass factor at Chaozhou over the seasons during top 30% high contribution

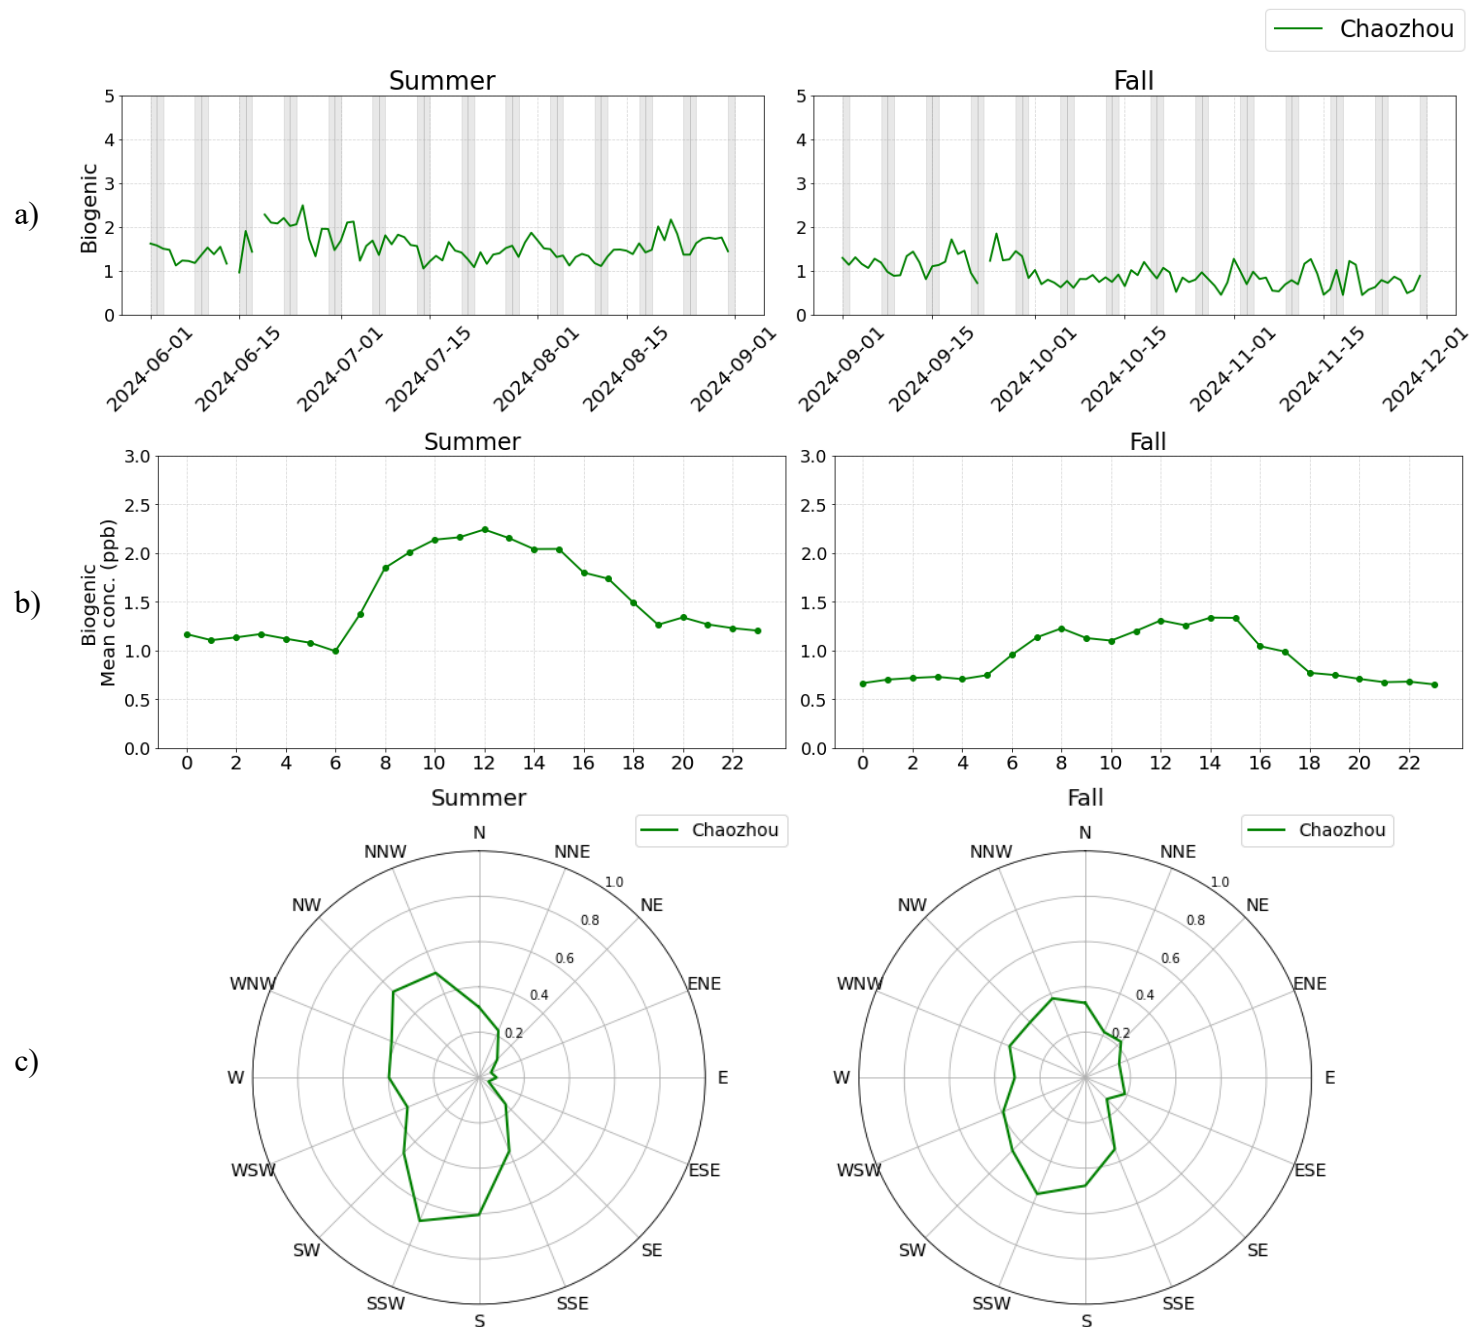

Figure S5: Temporal variation and CPF analysis for biogenic factors over the seasons, a) Timeseries of daily average factor contribution, b) Diurnal variation, and c) CPF analysis



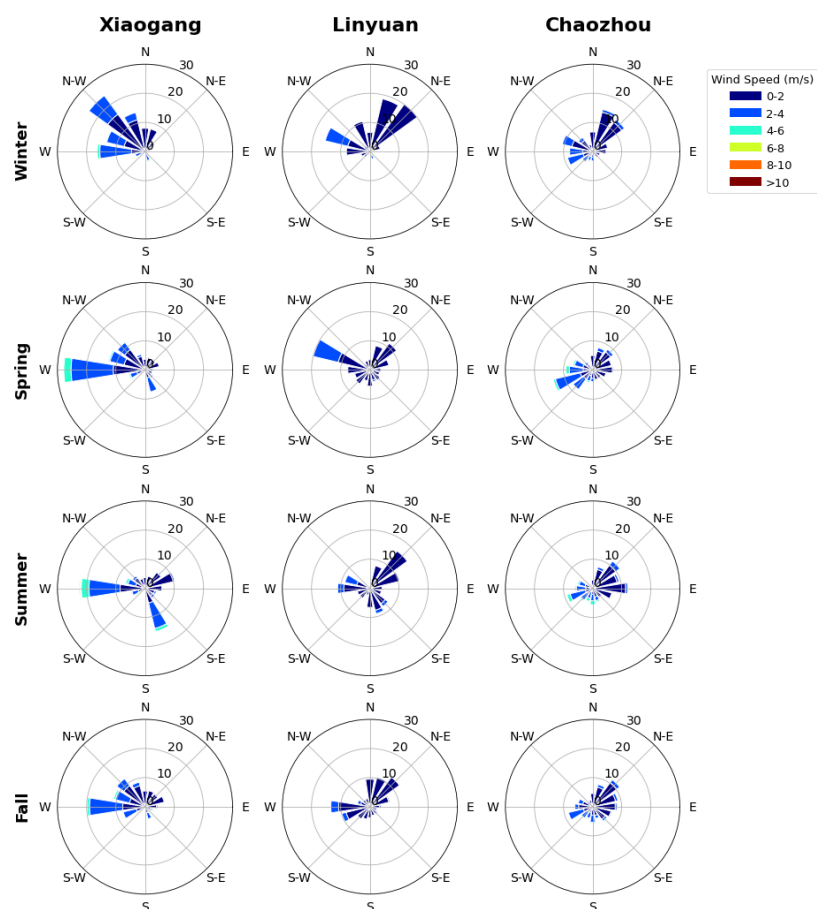

**Figure S6:** Seasonal wind profile at the three PAMS sites

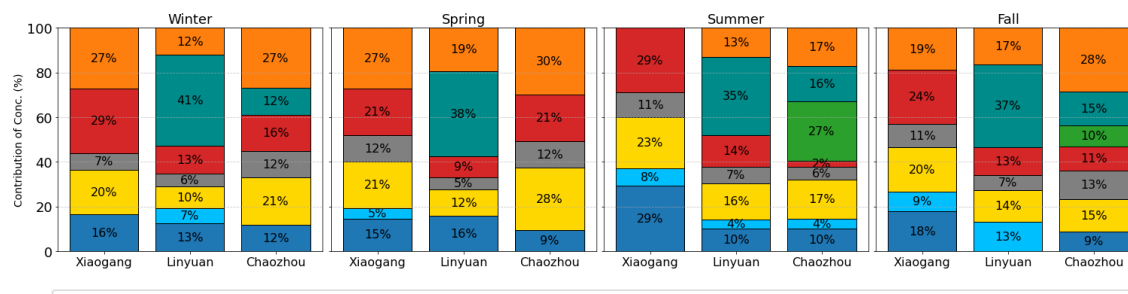

**Figure S7:** Contribution of concentration from eight resolved source factors. Xiaogang tends to have a relatively balanced influence among mixed, refinery, and aged air mass sources, suggesting complex source-receptor dynamics at this site. This reflects Xiaogang's transitional setting between industrial clusters and transportation hubs, where port activity, on-road emissions, and solvent-use industries intersect, producing overlapping chemical signals captured under the mixed factor.

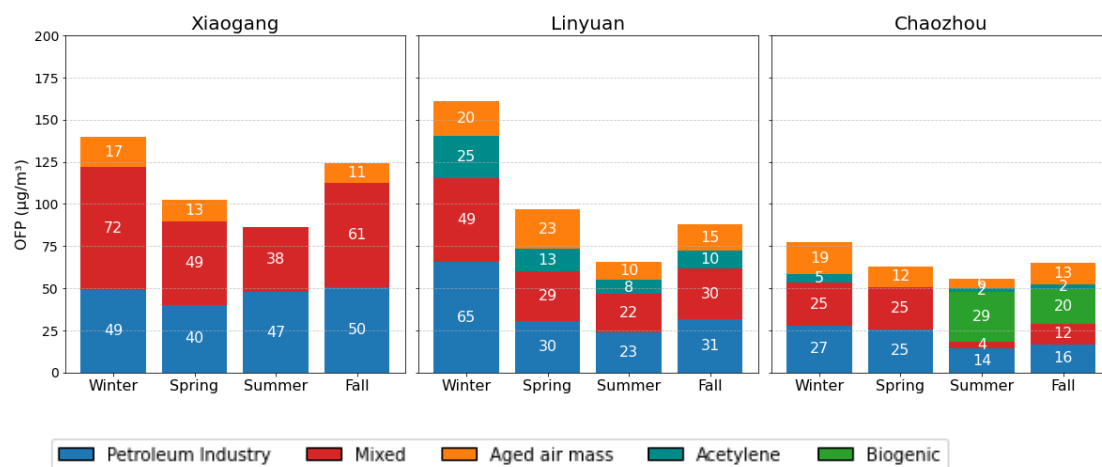

**Figure S8:** Ozone forming potential in perspective of seasonal variation

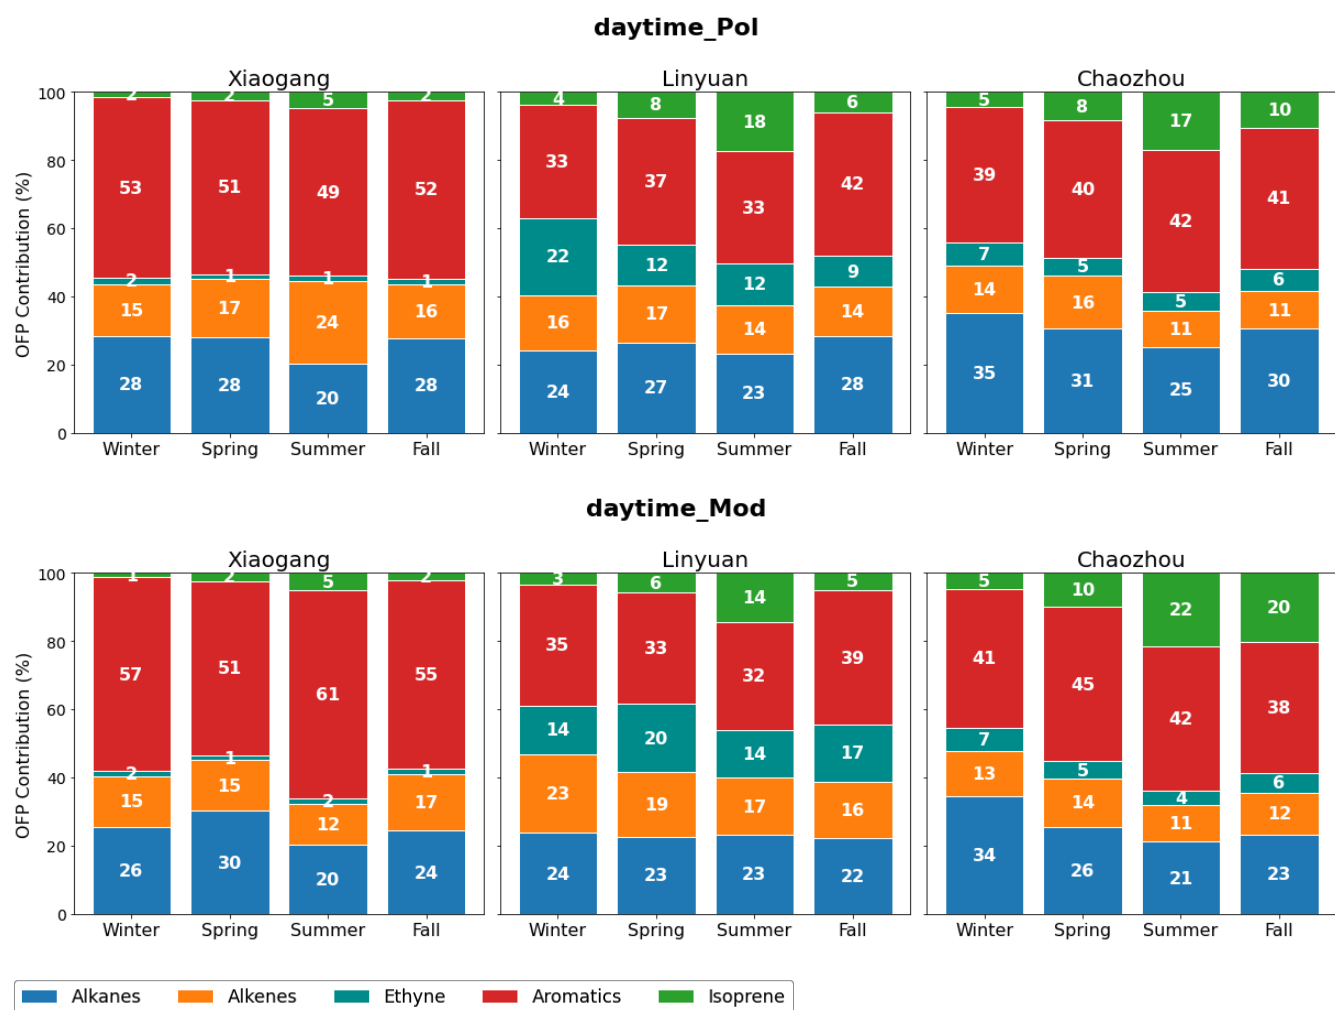

Figure S9: Ozone forming potential in perspective of species group variation during ozone pollution and moderate pollution days
